# Supplementary material for: High rejection performance ultrafiltration membrane with ultrathin dense layer fabricated by the movement and dissolution of metal–organic frameworks
Source: Royal Society of Chemistry journal article supplement (doi:10.1039/d0nj02700f), 2020-01-01
Supplement: d0nj02700f1.pdf [file d0nj02700f1.pdf]

## Supporting Information

# **High rejection performance ultrafiltration membrane with ultrathin dense layer fabricated by the movement and dissolution of metal–organic**

Qi Wang, Shaohu Zhang, Xiwei Ji, Fen Ran\*

*State Key Laboratory of Advanced Processing and Recycling of Non-ferrous Metals,  
School of Material Science and Engineering, Lanzhou University of Technology,  
Lanzhou 730050, P. R. China*

*\*Corresponding author: Fen Ran (ranfen@lut.edu.cn, or ranfen@163.com)*

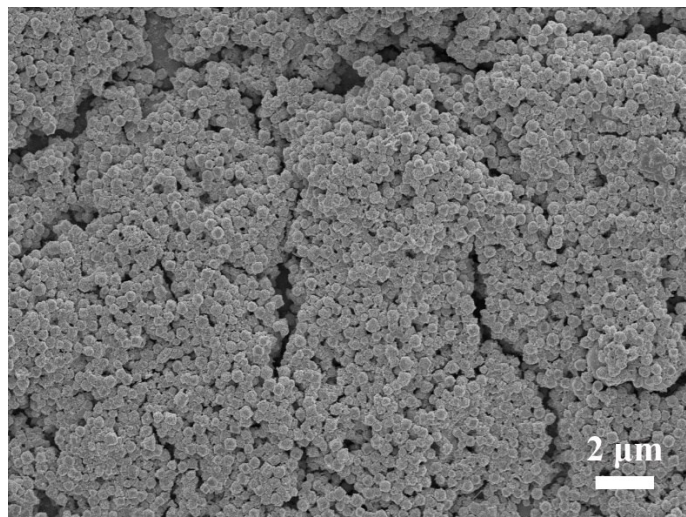

*Figure S1* SEM image of ZIF-67.

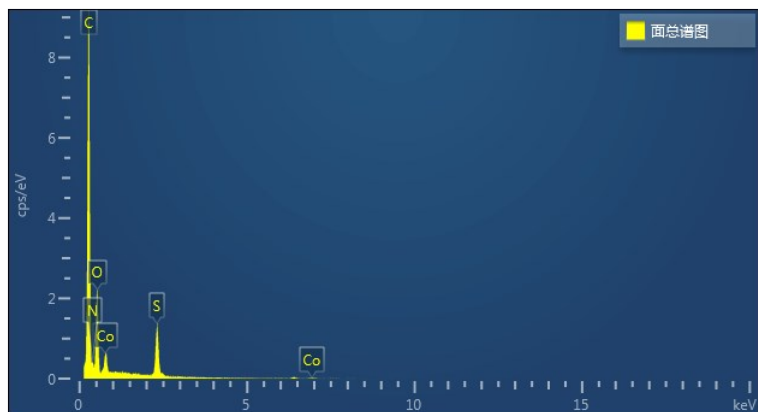

**Figure S2** EDS spectrum of M-PES/ZIF-67 (before).

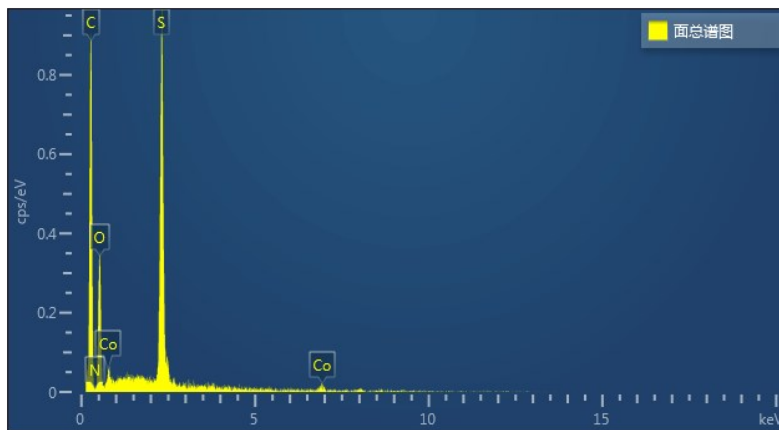

*Figure S3* EDS spectrum of M-PES/ZIF-67 (after).

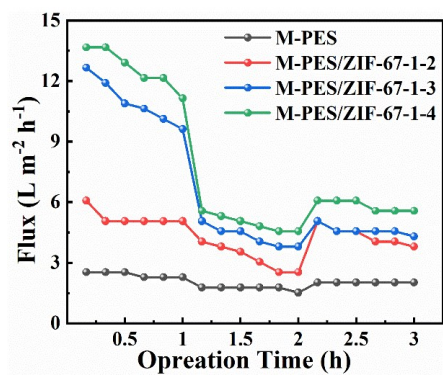

*Figure S4* Permeation properties of the membranes.

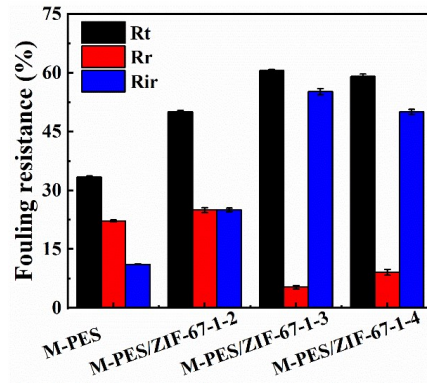

*Figure S5* Anti-contamination performance of the membrane.

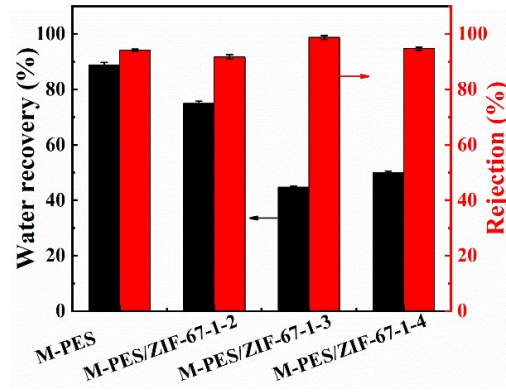

**Figure S6** Water flux recovery ratios (FRR) and BSA rejections ratios.

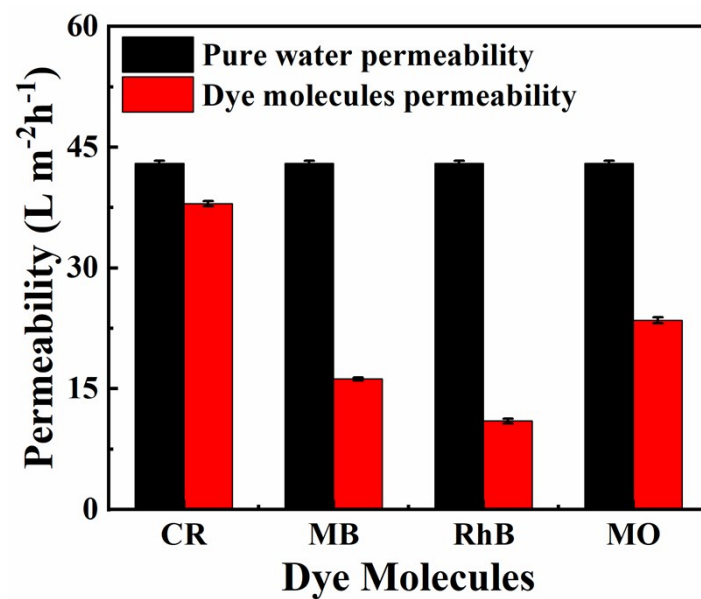

*Figure S7* Permeation performance of M-PES/ZIF-67-2-3 on water and dye molecules
